# Supplementary material for: Alkaline niobates ANbO3 (A = Li, Na, K) as heterogeneous catalysts for dipropyl sulfide oxidation
Source: Royal Society of Chemistry journal article supplement (doi:10.1039/c6ra21749d), 2016-01-01
Supplement: c6ra21749d1.pdf [file c6ra21749d1.pdf]

Alkaline niobates ANbO<sub>3</sub> (A=Li, Na, K) as heterogeneous catalysts for dipropyl sulfide  
oxidation

Candelaria Leal Marchena<sup>1,\*</sup>, Clara Saux<sup>1</sup>, Robinson Dinamarca<sup>2</sup>, Gina Pecchi<sup>2</sup>, Liliana  
Pierella<sup>1</sup>.

**Supporting Information**

Supporting figure of the Oxygen desorption profiles of ANbO<sub>3</sub> (A=Li, Na, K) niobates.

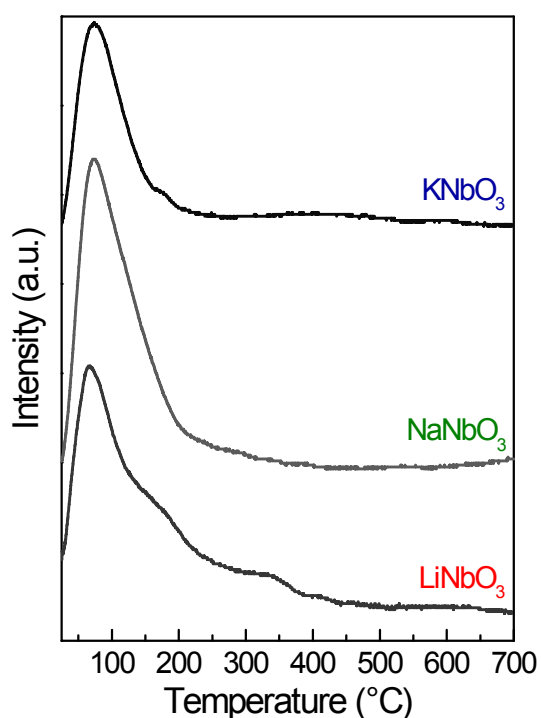

**Figure S1.** Oxygen desorption profiles of ANbO<sub>3</sub> (A=Li, Na, K) niobates.

<sup>1</sup> Centro de Investigación y Tecnología Química (CITeQ), UTN – CONICET, Maestro Marcelo López esq. Cruz Roja Argentina, (5016) Córdoba, Argentina.

<sup>2</sup> Department of Physical Chemistry, University of Concepción, Concepción, Chile.

\*Corresponding Author. Tel/Fax: +54 351 4690585; E-mail address: [cleal@frc.utn.edu.ar](mailto:cleal@frc.utn.edu.ar) (C. Leal Marchena)
